# Supplementary material for: The Effect of Glycerol, Sugar, and Maleic Anhydride on Pectin-Cellulose Thin Films Prepared from Orange Waste
Source: Polymers (Basel). 2019 Feb 27;11(3):392. doi: 10.3390/polym11030392 (PMC6474150; doi:10.3390/polym11030392)
Supplement: Supplementary file 1 [file polymers-11-00392-s001.pdf]

Supplementary material 1

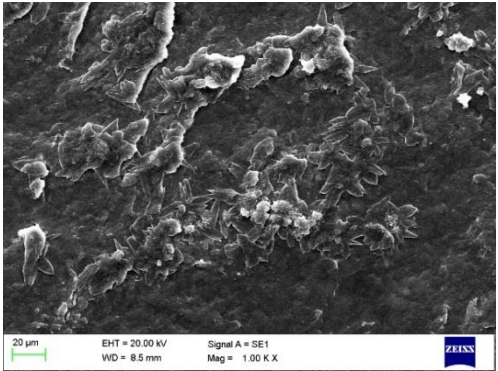

(a)

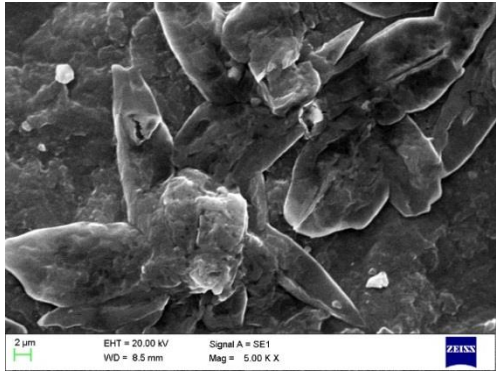

(b)

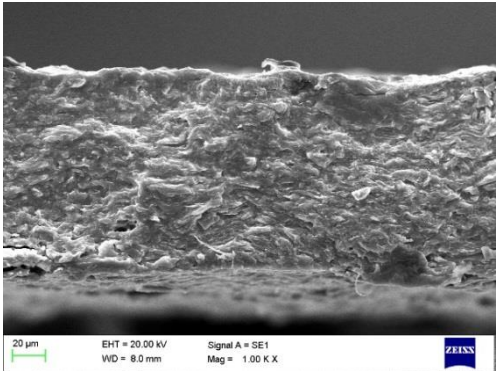

(c)

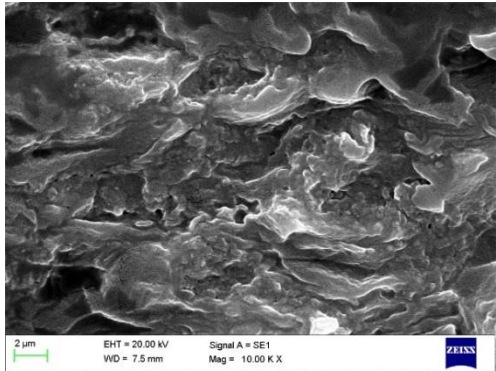

(d)

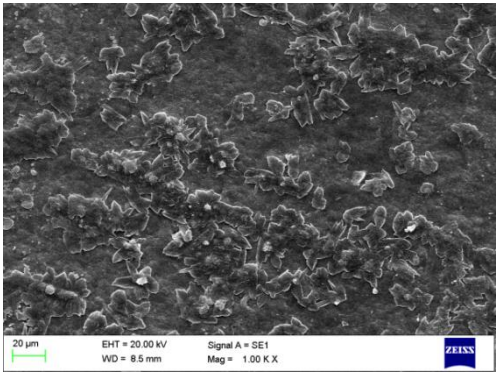

(e)

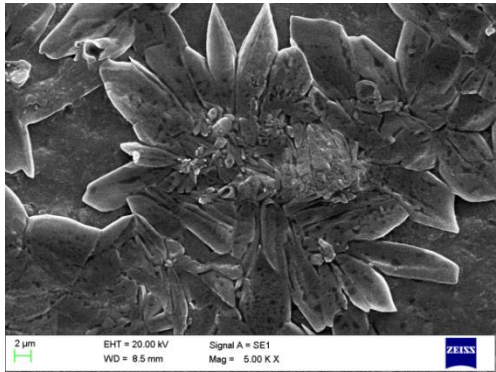

(f)

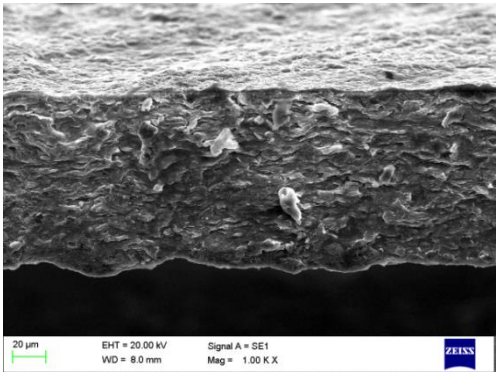

(g)

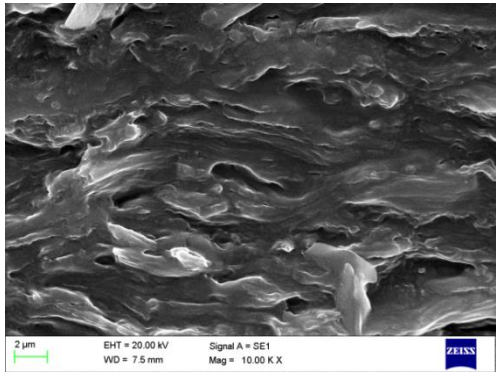

(h)

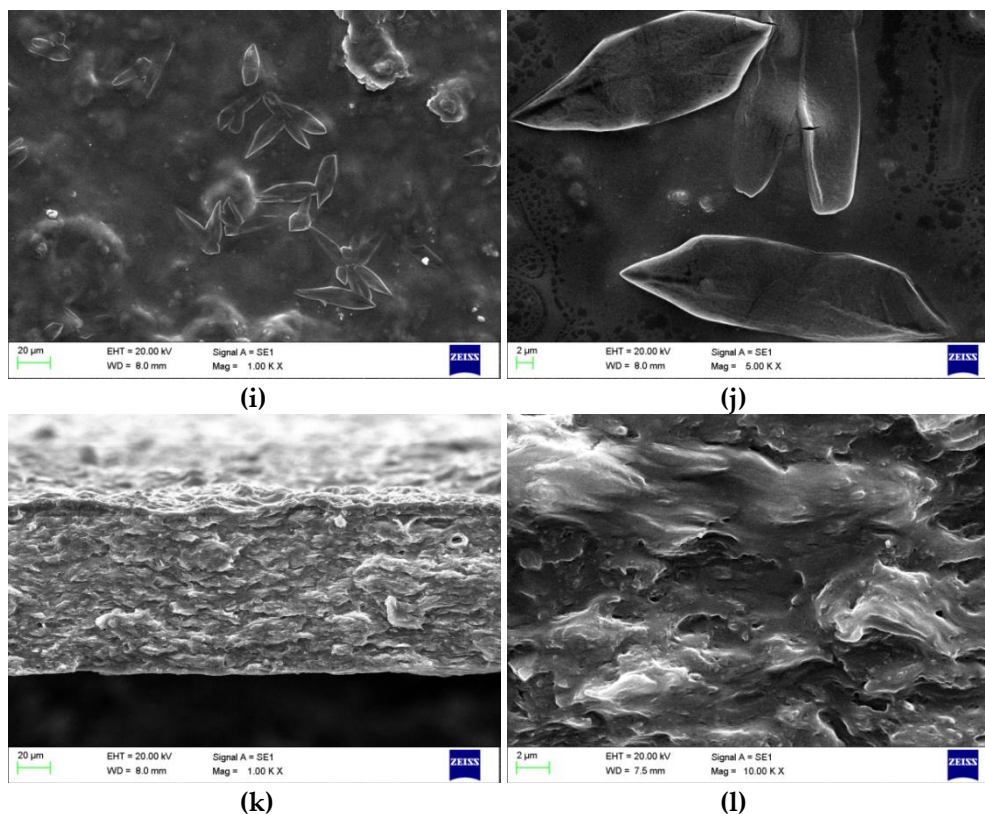

**Figure S1.** FE-SEM micrographs of film surfaces with a magnification of 1.00 K  $\times$  (a) and 5.00 K  $\times$  (b) and cross-sectional images with a magnification of 1.00 K  $\times$  (c) and 10.00 K  $\times$  (d) containing the highest concentrations of glycerol and sugar and the lowest concentration of MA (0.39%); film surfaces with a magnification of 1.00 K  $\times$  (e) and 5.00 K  $\times$  (f) and cross-sectional images with a magnification of 1.00 K  $\times$  (g) and 10.00 K  $\times$  (h) containing the highest concentrations of glycerol and sugar and the middle level of MA concentration (0.78%); film surfaces with a magnification of 1.00 K  $\times$  (i) and 5.00 K  $\times$  (i) and cross-sectional images with a magnification of 1.00 K  $\times$  (k) and 10.00 K  $\times$  (l) containing the highest concentrations of glycerol and sugar and the highest concentration of MA (1.56%).
